---

**Abstract**

# MED36/451: Health-Related World Wide Web Tool: An environment for building WWW-based healthy community

S Linn

Rambam Hospital and Technion, Haifa, Israel

---

**Abstract**

---

**Introduction:** It is difficult for doctors that lack technical background to create WWW-based community of patients and doctors.**Methods:** Interviews with physicians and medical students. Qualitative analysis. **Results and Discussion:** There is a need for easy-to-use tools for creating WWW-based health-related environment that are otherwise beyond the ability of the non-computer programmer. These tools should not only produce web pages for physicians on the WWW, but also create web-based communities that allow sharing of information between health professionals as well as between health professionals and the public. Examples of tools would include bulletin boards, patient's forums, health self-evaluation, electronic mail, administrative information such as clinics hours, procedures and payment schedules, and links to other major medical sites. There should be no requirements that each physician set up and maintain their own server. These servers will be maintained centrally in an organization (such as a hospital) and will be used by members of that organization. The physician should not be required to have any knowledge of HTTP at all. These tools should be universal and compatible with any server.**Conclusion:** This tool could be extremely helpful and successful.*(J Med Internet Res 1999;1(suppl1):e73)* doi: [10.2196/jmir.1.suppl1.e73](https://doi.org/10.2196/jmir.1.suppl1.e73)

---

**KEYWORDS**Web-tools; Internet

---

###Reviewer names will be inserted here### published 19.09.99.

*Please cite as:*

Linn S

MED36/451: Health-Related World Wide Web Tool: An environment for building WWW-based healthy community

J Med Internet Res 1999;1(suppl1):e73

URL: <http://www.jmir.org/1999/suppl1/e73/>

doi: [10.2196/jmir.1.suppl1.e73](https://doi.org/10.2196/jmir.1.suppl1.e73)

PMID:

Except where otherwise noted, articles published in the Journal of Medical Internet Research are distributed under the terms of the Creative Commons Attribution License (<http://www.creativecommons.org/licenses/by/2.0/>), which permits unrestricted use, distribution, and reproduction in any medium, provided the original work is properly cited.
